# Supplementary material for: Prediction of 3-hydroxypyridin-4-one (HPO) hydroxyl pKa values
Source: Royal Society of Chemistry journal article supplement (doi:10.1039/c2dt12396g), 2012-01-01
Supplement: c2dt12396g.pdf [file c2dt12396g.pdf]

**Table S1** The tests using the proton exchange scheme via higher level model chemistries for solvation free energies.

| Tests          | Model Chemistry                                                            | Results                                                                                                                  |
|----------------|----------------------------------------------------------------------------|--------------------------------------------------------------------------------------------------------------------------|
| 3 <sup>i</sup> | B3LYP/6-311++G(3df,3pd)/CPCM(UFF radii, water as solvent)//B3LYP/6-31+G(d) | There are no significant improvements compared to Test 2.                                                                |
| 4              | B971/6-311++G(3df,3pd)/CPCM(UFF radii, water as solvent)//B3LYP/6-31+G(d)  | There are no significant improvements compared to Test 2.                                                                |
| 5              | CBS-4M/CPCM(UFF radii, water as solvent)//B3LYP/6-31+G(d)                  | Some of the compounds could not be modelled using the Windows Gaussian 09 system owing to computer resource limitations. |
| 6              | CBS-4Q/CPCM(UFF radii, water as solvent)//B3LYP/6-31+G(d)                  | Some of the compounds could not be modelled using the Windows Gaussian 09 system owing to computer resource limitations. |
| 7              | Gaussian-4/CPCM(UFF radii, water as solvent)//B3LYP/6-31+G(d)              | Some of the compounds could not be modelled using the Windows Gaussian 09 system owing to computer resource limitations. |

<sup>i</sup> B3LYP/6-311++G(3df,3pd)/CPCM(UFF radii, water as solvent)//B3LYP/6-31+G(d) means that the single-point energy calculation at B3LYP/6-311++G(3df,3pd)/CPCM(UFF radii, water as solvent) based on the optimised structure at B3LYP/6-31+G(d) in vacuum.

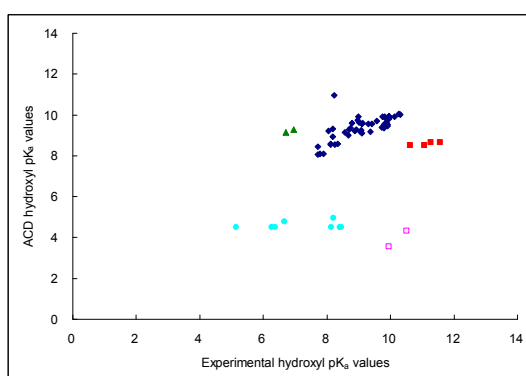

**Fig. S1** ACD predictions for hydroxyl pK<sub>a</sub> values.

- ▲ 2-(piperidin-1-ylmethyl)-HPOs.
- 2-fluoro-HPOs.
- 2-amido-HPOs.
- 2,6-difluoro-HPOs.

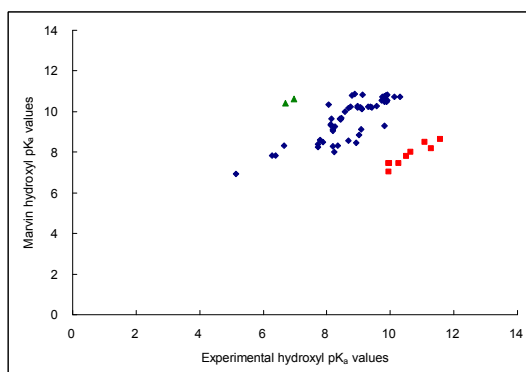

**Fig. S2** Marvin predictions for hydroxyl pK<sub>a</sub> values.

- ▲ 2-(piperidin-1-ylmethyl)-HPOs.
- 2-fluoro-HPOs.
